# Supplementary material
Source: publisher figshare collection journal article supplement (https://acs.figshare.com/ndownloader/files/20188914)
Supplement: Supplementary file 1 [file 20188914]

# Supporting Information

## Comparative investigation on the activity degradation mechanism of Pt/C and PtCo/C electrocatalysts in PEMFCs during accelerate degradation process characterized by an In-Situ X-ray absorption fine structure

FangLing Jiang<sup>1</sup>, FengJuan Zhu<sup>1</sup>, Fan Yang<sup>1</sup>, XiaoHui Yan<sup>1</sup>, AiMing Wu<sup>1</sup>,  
LiuXuan Luo<sup>1</sup>, XiaoLin Li<sup>1</sup>, JunLiang Zhang<sup>1,\*</sup>

<sup>1</sup> Shanghai Jiao Tong Univ, Inst Fuel Cells, Shanghai 200240, Peoples R China

\* Corresponding author. E-mail addresses: junliang.zhang@sjtu.edu.cn;

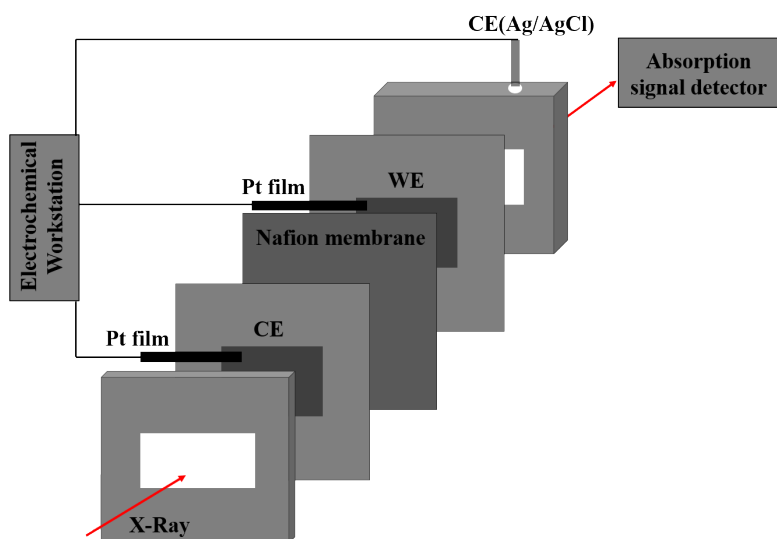

Scheme S1. The setup of in-situ XAS measurement fuel cell. The incident X-Ray beam hits the MEAs sample, which is composed of CE, nafion membrane and WE, and creates a absorption signal at the detector. WE, CE and RE were connected with the extra electrochemical workstation through Pt film due to investigate the potential-dependence structure of the sample. RE, reference electrode; WE, working electrode; CE, counter electrode.

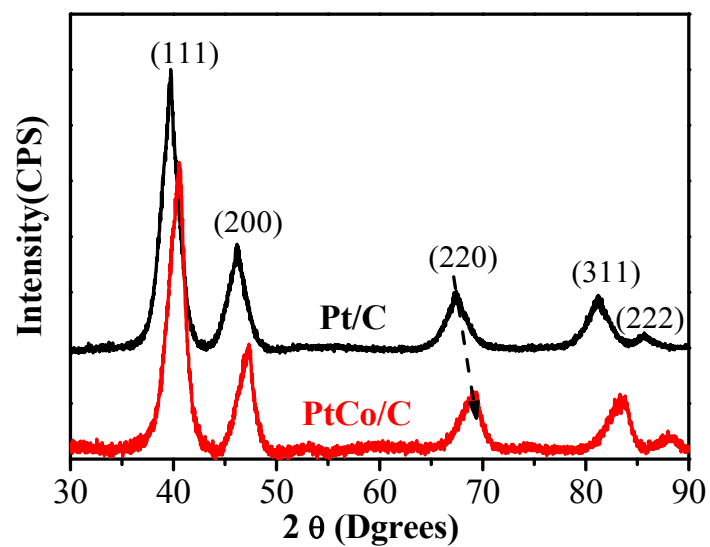

Figure S1. XRD patterns for as-prepared Pt/C and PtCo/C electrocatalysts.

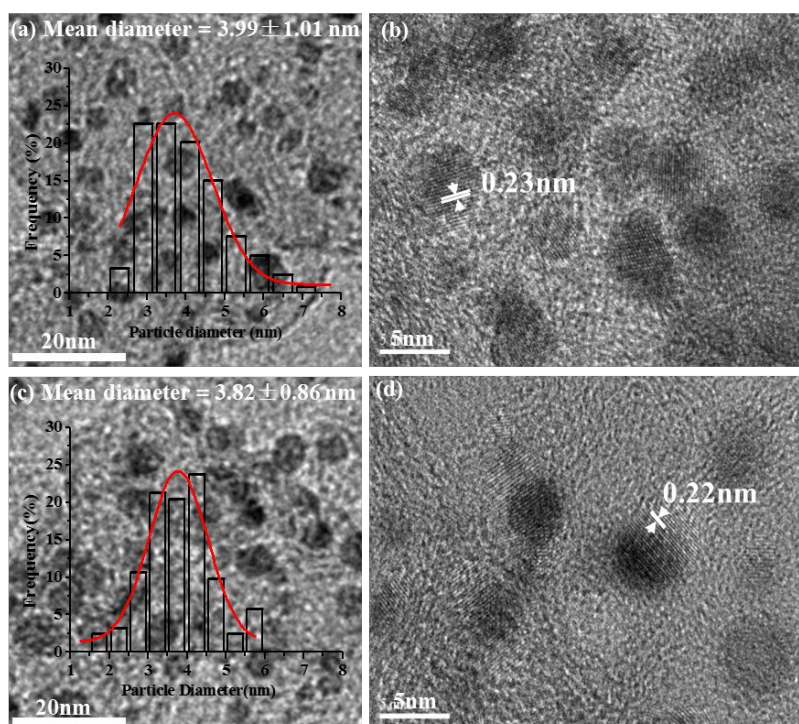

Figure S2. Representative TEM images and the corresponding histograms of particle diameter distribution (insets) for as-prepared Pt/C (a) and PtCo/C (c) electrocatalysts. The HRTEM images for as-prepared Pt/C (b) and PtCo/C (d) electrocatalysts.

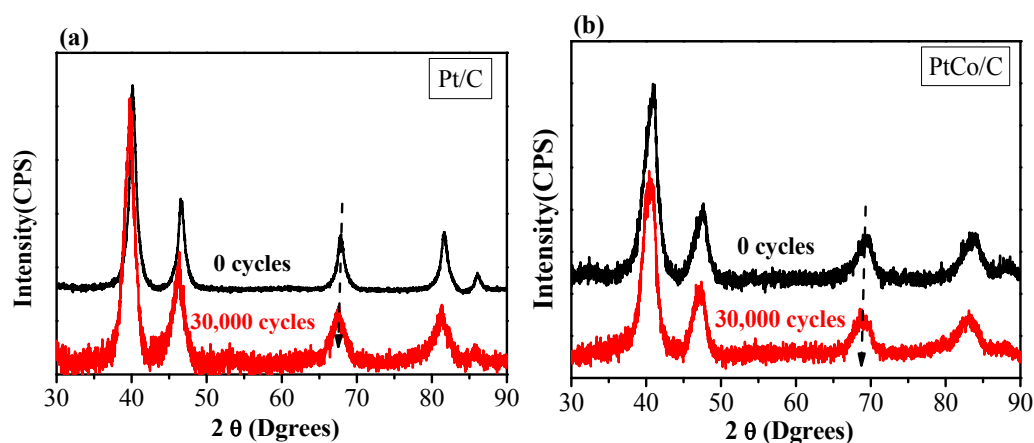

Figure S3. XRD patterns for Pt/C (a) and PtCo/C (b) electrocatalysts in MEAs at the 0 and 30,000 ADT cycles.

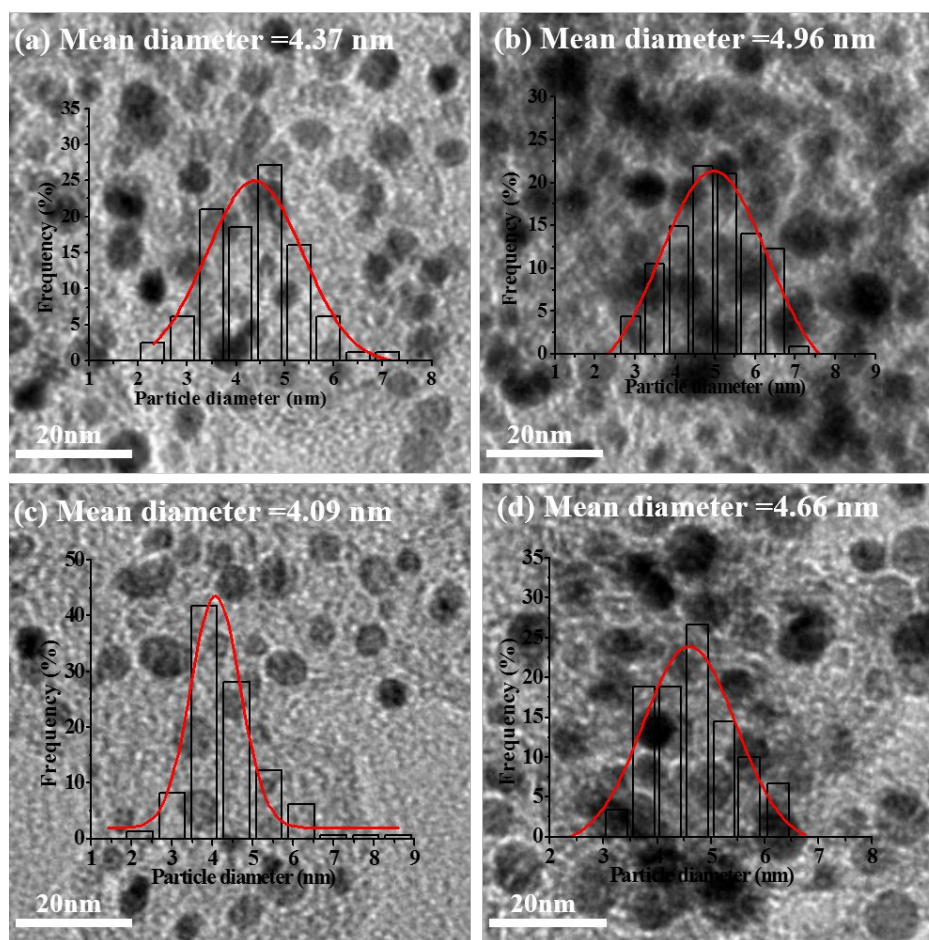

Figure S4. Representative TEM images and the corresponding histograms of particle diameter distribution (insets) for Pt/C electrocatalyst in MEAs at the 0 (a), 30,000 (b) ADT cycles and PtCo/C electrocatalyst in MEAs at the 0 (c), 30,000 (d) ADT cycles.



|                  |        |               |                   |      |               |                   |      |               |                   |      |       |
|------------------|--------|---------------|-------------------|------|---------------|-------------------|------|---------------|-------------------|------|-------|
| 30,000<br>cycles | 0.65 V | $6.8 \pm 0.6$ | $2.716 \pm 0.006$ | 6.39 | $1.5 \pm 0.3$ | $2.687 \pm 0.016$ | 6.88 | $0.8 \pm 0.2$ | $2.007 \pm 0.017$ | 3.47 | 0.009 |
|                  | 1.2 V  | $6.5 \pm 0.2$ | $2.724 \pm 0.002$ | 5.88 | $1.3 \pm 0.1$ | $2.681 \pm 0.006$ | 6.00 | $0.9 \pm 0.1$ | $2.007 \pm 0.006$ | 3.92 | 0.001 |
|                  | 0.9 V  | $6.5 \pm 0.2$ | $2.722 \pm 0.002$ | 6.20 | $1.3 \pm 0.1$ | $2.687 \pm 0.004$ | 6.00 | $0.8 \pm 0.1$ | $2.006 \pm 0.005$ | 3.67 | 0.003 |
|                  | 0.65 V | $6.8 \pm 0.4$ | $2.725 \pm 0.002$ | 5.75 | $1.3 \pm 0.1$ | $2.681 \pm 0.005$ | 6.00 | $0.7 \pm 0.1$ | $2.010 \pm 0.007$ | 3.92 | 0.001 |

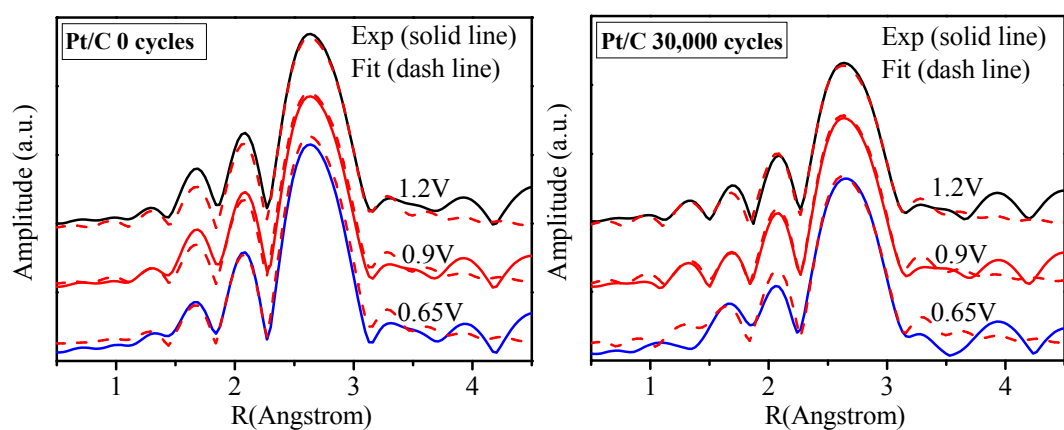

Figure S6. The R-space experiment (solid line) and fitting data (dash line) of Pt L<sub>3</sub>-edge XAFS for Pt/C electrocatalyst with the different potential at the 0, and 30,000 ADT cycles.

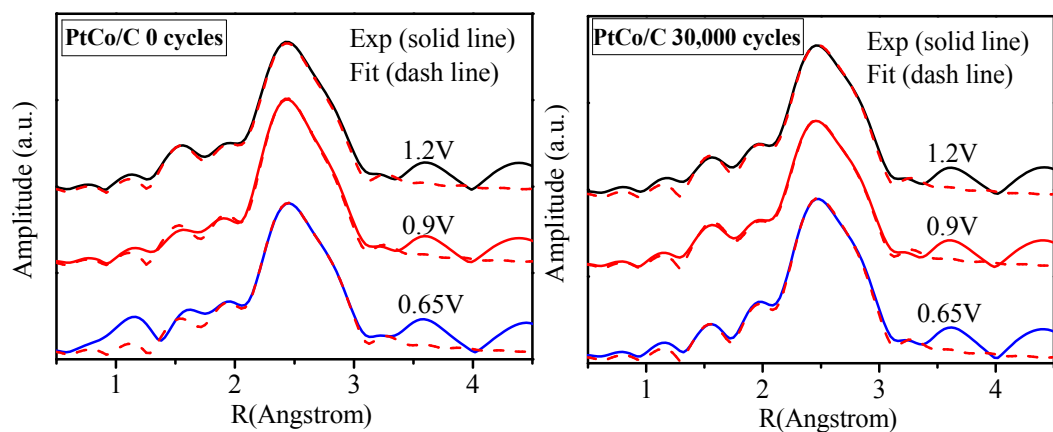

Figure S7. The R-space experiment (solid line) and fitting data (dash line) of Pt L<sub>3</sub>-edge XAFS for PtCo/C electrocatalyst with the different potential at the 0, and 30,000 ADT cycles.

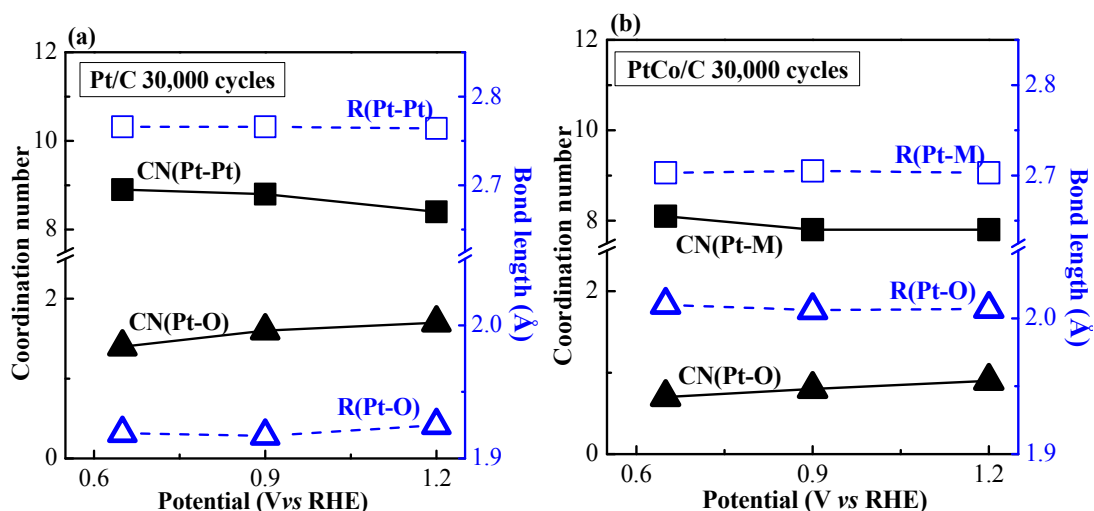

Figure S8. The coordination number and bond length of the first shell of Pt absorber at the Pt L<sub>3</sub>-edge EXAFS spectra as a function of potential for Pt/C (a) and PtCo/C (b) electrocatalysts at the 30,000 ADT cycles.

Table S3. Structure parameters for PtCo/C electrocatalyst as obtained from in situ Co K-edge XAFS experiments with different potential at the 0, and 30,000 ADT cycles. Amp fixed at 0.79 for Co, as obtained by fitting the Co foil. Fits were done in R-space, K<sup>1,2,3</sup> weighting. For Co, 1.5 < R < 3.1 Å and ΔK = 3.5 – 12.8 Å<sup>-1</sup> was used.

| PtCo/C        |            | Co-Co     |               |                                     | Co-Pt     |               |                                     | Co-O      |                |                                     | R-factor |
|---------------|------------|-----------|---------------|-------------------------------------|-----------|---------------|-------------------------------------|-----------|----------------|-------------------------------------|----------|
| ADT           | Potentials | CN        | R (Å)         | σ <sup>2</sup>                      | CN        | R (Å)         | σ <sup>2</sup>                      | CN        | R (Å)          | σ <sup>2</sup>                      |          |
| cycles        |            |           |               | (10 <sup>-3</sup> Å <sup>-1</sup> ) |           |               | (10 <sup>-3</sup> Å <sup>-1</sup> ) |           |                | (10 <sup>-3</sup> Å <sup>-1</sup> ) |          |
|               |            |           |               |                                     |           |               |                                     |           |                |                                     |          |
| 0 cycles      | 0.9 V      | 1.0 ± 0.1 | 2.666 ± 0.006 | 1.90                                | 6.1 ± 0.4 | 2.688 ± 0.003 | 5.97                                | 0.9 ± 0.1 | 2.0141 ± 0.014 | 6.22                                | 0.002    |
| 30,000 cycles | 0.9 V      | 0.8 ± 0.1 | 2.664 ± 0.008 | 0.98                                | 5.6 ± 0.5 | 2.687 ± 0.004 | 6.00                                | 1.5 ± 0.1 | 2.134 ± 0.010  | 3.94                                | 0.003    |

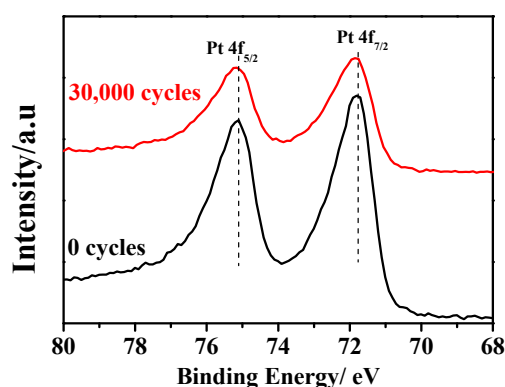

Figure S9 XPS spectra in the Pt 4f regions for Pt/C electrocatalysts at the 0 (black line), and 30,000 (red line) ADT cycles.

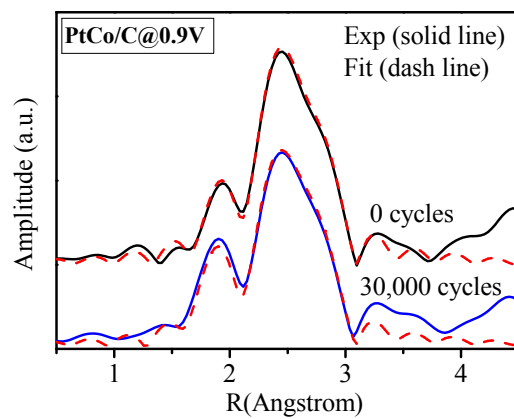

Figure S10. The R-space experiment (solid line) and fitting data (dash line) of Co K-edge XAFS for PtCo/C electrocatalyst at 0.9 V at the 0, and 30,000 ADT cycles.

Table S4. ICP-AES for PtCo/C electrocatalysts in MEAs.

| Molar ratio                   | 0 cycles | 30,000 cycles |
|-------------------------------|----------|---------------|
| $X_{\text{Co}}/X_{\text{Pt}}$ | 0.19     | 0.16          |
